# Supplementary material for: Targeted metabolomics suggests a probable role of the FTO gene in the kynurenine pathway in prediabetes
Source: PeerJ. 2022 Jun 21;10:e13612. doi: 10.7717/peerj.13612 (PMC9231341; doi:10.7717/peerj.13612)
Supplement: Supplemental Information 3 — The variable importance in projection and the FTO genotype [file peerj-10-13612-s003.xlsx]

## Sheet: Sheet1
		Metabolites	VIP score
		Tryptophan	2.39114
		Phosphatidylcholine acyl-alkyl C30:0	2.04377
		lysophosphatidylcholine acyl C16:1	1.72065
		Tyrosine	1.58531
		Alanine	1.54158
		Phosphatidylcholine diacyl C32:0	1.47861
		lysophosphatidylcholine acyl C20:3	1.44303
		Phosphatidylcholine acyl-alkyl C40:1	1.36549
		Phosphatidylcholine diacyl C36:0	1.26485
		Phosphatidylcholine acyl-alkyl C38:6	1.26221
		Phosphatidylcholine acyl-alkyl C34:3	1.24792
		Phosphatidylcholine diacyl C36:6	1.23942
		Phosphatidylcholine diacyl C30:0	1.2352
		Phosphatidylcholine diacyl C36:4	1.22267
		Methionine	1.19549
		Phosphatidylcholine diacyl C36:1	1.19354
		Phosphatidylcholine acyl-alkyl C32:1	1.19349
		Glutamine	1.19079
		Phosphatidylcholine diacyl C36:5	1.18543
		Phosphatidylcholine diacyl C36:3	1.18282
		lysophosphatidylcholine acyl C18:1	1.17549
		Phosphatidylcholine acyl-alkyl C42:1	1.17324
		Phosphatidylcholine diacyl C42:5	1.17127
		Phosphatidylcholine acyl-alkyl C38:0	1.16647
		Phosphatidylcholine acyl-alkyl C34:0	1.16503
		Phosphatidylcholine diacyl C34:4	1.15912
		lysophosphatidylcholine acyl C28:0	1.14764
		Phosphatidylcholine diacyl C38:5	1.14166
		lysophosphatidylcholine acyl C20:4	1.14091
		Threonine	1.13858
		Phosphatidylcholine diacyl C40:3	1.12558
		Phosphatidylcholine acyl-alkyl C36:0	1.12544
		Phosphatidylcholine diacyl C34:3	1.12147
		Histidine	1.11732
		Phosphatidylcholine diacyl C32:1	1.10934
		Phosphatidylcholine diacyl C40:4	1.10877
		Phosphatidylcholine acyl-alkyl C36:5	1.10257
		Phosphatidylcholine diacyl C32:2	1.07435
		Phosphatidylcholine diacyl C42:1	1.07344
		Phosphatidylcholine acyl-alkyl C30:1	1.05834
		Phosphatidylcholine diacyl C30:2	1.05302
		lysophosphatidylcholine acyl C28:1	1.0511
		Phosphatidylcholine acyl-alkyl C42:0	1.04334
		Phosphatidylcholine diacyl C38:4	1.03208
		Phosphatidylcholine diacyl C40:5	1.02522
		Phosphatidylcholine diacyl C42:6	1.01865
		Phosphatidylcholine diacyl C42:2	0.999077
		Phosphatidylcholine diacyl C38:0	0.989651
		Phosphatidylcholine diacyl C38:6	0.985664
		Phosphatidylcholine diacyl C32:3	0.981464
		lysophosphatidylcholine acyl C16:0	0.967046
		Phosphatidylcholine diacyl C40:6	0.942948
		Phosphatidylcholine diacyl C42:4	0.940832
		Citrulline	0.929812
		Phosphatidylcholine diacyl C40:2	0.924605
		Phosphatidylcholine diacyl C38:3	0.923252
		Phosphatidylcholine diacyl C34:1	0.920692
		Phosphatidylcholine diacyl C36:2	0.920546
		lysophosphatidylcholine acyl C18:0	0.9184
		Phosphatidylcholine acyl-alkyl C42:3	0.911695
		lysophosphatidylcholine acyl C18:2	0.898364
		Phosphatidylcholine acyl-alkyl C42:2	0.85886
		Phosphatidylcholine acyl-alkyl C42:4	0.852424
		Phosphatidylcholine diacyl C42:0	0.848008
		Phosphatidylcholine acyl-alkyl C40:4	0.84286
		Phosphatidylcholine acyl-alkyl C34:1	0.841919
		Phosphatidylcholine acyl-alkyl C40:6	0.836335
		Phosphatidylcholine acyl-alkyl C34:2	0.833901
		Phosphatidylcholine acyl-alkyl C36:1	0.832896
		Phosphatidylcholine acyl-alkyl C38:3	0.831478
		Phosphatidylcholine acyl-alkyl C36:4	0.820695
		Isoleucine	0.810554
		Phosphatidylcholine acyl-alkyl C40:2	0.804483
		Phosphatidylcholine acyl-alkyl C30:2	0.803171
		Phosphatidylcholine acyl-alkyl C36:2	0.802058
		Leucine	0.78836
		lysophosphatidylcholine acyl C26:1	0.78331
		Phosphatidylcholine acyl-alkyl C36:3	0.778538
		lysophosphatidylcholine acyl C24:0	0.776661
		Phosphatidylcholine acyl-alkyl C44:3	0.775066
		lysophosphatidylcholine acyl C26:0	0.77169
		Phosphatidylcholine diacyl C40:1	0.769479
		Phosphatidylcholine acyl-alkyl C32:2	0.768564
		Phosphatidylcholine acyl-alkyl C38:2	0.768222
		Phosphatidylcholine acyl-alkyl C38:4	0.763126
		Phosphatidylcholine acyl-alkyl C44:6	0.75125
		Phosphatidylcholine acyl-alkyl C38:5	0.750284
		Phosphatidylcholine acyl-alkyl C38:1	0.735563
		lysophosphatidylcholine acyl C14:0	0.72086
		Phosphatidylcholine acyl-alkyl C40:5	0.719446
		Phosphatidylcholine diacyl C34:2	0.677418
		Phosphatidylcholine diacyl C26:0	0.677337
		Phosphatidylcholine diacyl C28:1	0.671185
		Phosphatidylcholine diacyl C38:1	0.665159
		Glutamate	0.651375
		Phosphatidylcholine acyl-alkyl C42:5	0.641439
		Phosphatidylcholine acyl-alkyl C44:5	0.626266
		Glycine	0.601655
		Phosphatidylcholine acyl-alkyl C40:3	0.595987
		Ornithine	0.592485
		lysophosphatidylcholine acyl C17:0	0.572968
		Phosphatidylcholine diacyl C24:0	0.495
		Phosphatidylcholine acyl-alkyl C44:4	0.476551
		Arginine	0.470686
		Asparagine	0.378247
		Proline	0.332898
		Phenylalanine	0.290937
		Serine	0.238725
		Lysine	0.220267
		Valine	0.0986037
		Aspartic acid	0.0548854
